# Supplementary material for: Development of Helical Myofiber Tracts in the Human Fetal Heart: Analysis of Myocardial Fiber Formation in the Left Ventricle From the Late Human Embryonic Period Using Diffusion Tensor Magnetic Resonance Imaging
Source: PubMed Central journal article supplement — J Am Heart Assoc. 2020 Sep 30;9(19):e016422. doi: 10.1161/JAHA.120.016422 (PMC7792405; doi:10.1161/jaha.120.016422), 2020-09-30
Supplement: JAH3-9-e016422-s001.pdf [file JAH3-9-e016422-s001.pdf]

# **SUPPLEMENTAL MATERIAL**

**Table S1. Parameters of MRI acquisition.**

|                                                                       | Our study   |             | Pervolaraki et al.<br>[18] |
|-----------------------------------------------------------------------|-------------|-------------|----------------------------|
|                                                                       | 19-mm coil  | 72-mm coil  |                            |
| Magnet                                                                | 7T          | 7T          | 9.4T                       |
| Coil size (inner diameter, mm)                                        | 19          | 72          | ND                         |
| Repetition time (ms)                                                  | 300         | 300         | 500                        |
| Echo time (ms)                                                        | 19.337      | 19.037      | 15                         |
| Field of view (mm <sup>3</sup> )                                      | 15x15x15    | 15x22.5x15  | 14.8x14.8x20.8             |
| Matrix                                                                | 150x150x150 | 100x150x100 | 128x128x128                |
| Resolution (isotropic, $\mu$ m)                                       | 100         | 150         | 100~170                    |
| Receiver bandwidth (kHz)                                              | 50          | 50          | ND                         |
| Number of non-DW images (i.e. nominal b-value = 0 s/mm <sup>2</sup> ) | 5           | 5           | ND                         |
| Number of gradient directions                                         | 30          | 30          | 12                         |
| Nominal b-value (s/mm <sup>2</sup> )                                  | 1000        | 600         | 1000                       |
| Acquisition time                                                      | 65h 38m     | 43h 45m     | ND                         |
| Number of scans                                                       | 1           | 2           | ND                         |
